# Supplementary material for: Association analysis of 31 common polymorphisms with type 2 diabetes and its related traits in Indian sib pairs
Source: Springer Nature journal article supplement (doi:10.1007/s00125-011-2355-6), 2011-11-03
Supplement: MOESM3 [file 125_2011_2355_MOESM3_ESM.pdf]

**Table-2: Allele frequencies and genetic association estimates of previously identified loci for type-2 diabetes**

| <sup>a</sup> SNP | Gene                | <sup>b</sup> Minor allele frequency – HapMap GIH | <sup>c</sup> Minor Allele Frequency in IMS | <sup>d</sup> Odds ratio for Type-2 diabetes ( <sup>e</sup> 95% CI, <sup>h</sup> p-value) N=561 pairs | <sup>f</sup> Adjusted Odds ratio for Type-2 diabetes ( <sup>e</sup> 95% CI, p-value) N=561 pairs |
|------------------|---------------------|--------------------------------------------------|--------------------------------------------|------------------------------------------------------------------------------------------------------|--------------------------------------------------------------------------------------------------|
| rs1799854        | <i>ABCC8</i>        | 0.35 (A)                                         | 0.32 (T)                                   | 0.88 (0.67-1.17, 0.39)                                                                               | 0.86 (0.64-1.14, 0.30)                                                                           |
| rs2641348        | <i>ADAM30</i>       | 0.23 (G)                                         | 0.24 (G)                                   | 1.12 (0.83-1.53, 0.45)                                                                               | 1.13 (0.83-1.55, 0.43)                                                                           |
| rs10490072       | <i>BCL11A</i>       | 0.15 (C)                                         | 0.09 (C)                                   | 1.13 (0.73-1.75, 0.59)                                                                               | 1.08 (0.69-1.69, 0.73)                                                                           |
| rs12779790       | <i>CDC123</i>       | n/a                                              | 0.13 (G)                                   | 0.97 (0.68-1.40, 0.89)                                                                               | 0.97 (0.67-1.41, 0.88)                                                                           |
| rs10811661       | <i>CDKN2A/B</i>     | 0.09 (C)                                         | 0.15 (C)                                   | 0.84 (0.59-1.21, 0.35)                                                                               | 0.79 (0.55-1.14, 0.22)                                                                           |
| rs10946398       | <i>CDKALI</i>       | 0.22 (C)                                         | 0.26 (C)                                   | 0.96 (0.71-1.30, 0.81)                                                                               | 0.99 (0.73-1.36, 0.98)                                                                           |
| rs7754840        | <i>CDKALI</i>       | 0.22 (C)                                         | 0.26 (C)                                   | 0.99 (0.73-1.33, 0.93)                                                                               | 1.02 (0.76-1.39, 0.87)                                                                           |
| rs7756992        | <i>CDKALI</i>       | 0.24 (G)                                         | 0.26 (G)                                   | 1.01 (0.75-1.36, 0.94)                                                                               | 1.03 (0.76-1.40, 0.85)                                                                           |
| rs932206         | <i>CXCR4</i>        | 0.16 (T)                                         | 0.14 (T)                                   | 1.10 (0.76-1.59, 0.61)                                                                               | 1.05 (0.72-1.53, 0.79)                                                                           |
| rs1153188        | <i>DCD</i>          | 0.17 (T)                                         | 0.19 (A)                                   | 1.24 (0.90-1.72, 0.19)                                                                               | 1.17 (0.90-1.54, 0.23)                                                                           |
| rs17044137       | <i>FLJ39370</i>     | 0.12 (A)                                         | 0.10 (A)                                   | 0.97 (0.64-1.47, 0.90)                                                                               | 1.02 (0.67-1.56, 0.92)                                                                           |
| rs9939609        | <i>FTO</i>          | 0.26 (A)                                         | 0.32 (A)                                   | 1.31 (0.99-1.73, 0.06)                                                                               | 1.29 (0.97-1.72, 0.08)                                                                           |
| rs2268573        | <i>GCK</i>          | 0.39 (G)                                         | 0.44 (G)                                   | 1.10 (0.86-1.42, 0.44)                                                                               | 1.11 (0.86-1.44, 0.42)                                                                           |
| rs5015480        | <i>HHEX</i>         | 0.44 (C)                                         | 0.45 (C)                                   | 0.90 (0.70-1.16, 0.43)                                                                               | 0.87 (0.67-1.13, 0.31)                                                                           |
| rs7923837        | <i>HHEX</i>         | 0.38 (G)                                         | 0.45 (G)                                   | 1.07 (0.83-1.38, 0.59)                                                                               | 1.12 (0.86-1.45, 0.38)                                                                           |
| rs1111875        | <i>HHEX</i>         | 0.41 (C)                                         | 0.41 (G)                                   | 1.15 (0.88-1.49, 0.30)                                                                               | 1.10 (0.85-1.43, 0.44)                                                                           |
| rs2237892        | <i>KCNQ1</i>        | 0.01 (T)                                         | 0.01 (T)                                   | 0.70 (0.26-1.89, 0.48)                                                                               | 0.67 (0.24-1.87, 0.45)                                                                           |
| rs2876711        | <i>KCTD12</i>       | 0.26 (C)                                         | 0.30 (C)                                   | 0.89 (0.67-1.17, 0.41)                                                                               | 0.91 (0.68-1.21, 0.51)                                                                           |
| rs1256517        | <i>LOC646279</i>    | 0.10 (C)                                         | 0.13 (C)                                   | 1.06 (0.72-1.55, 0.76)                                                                               | 1.02 (0.69-1.52, 0.91)                                                                           |
| rs10823406       | <i>NGN3</i>         | 0.27 (A)                                         | 0.23 (A)                                   | 1.29 (0.95-1.75, 0.10)                                                                               | 1.33 (0.97-1.82, 0.07)                                                                           |
| rs10923931       | <i>NOTCH2</i>       | 0.22 (T)                                         | 0.22 (T)                                   | 1.16 (0.85-1.59, 0.34)                                                                               | 1.20 (0.87-1.66, 0.26)                                                                           |
| rs1801282        | <i>PPARG</i>        | 0.09 (G)                                         | 0.13 (G)                                   | 0.99 (0.65-1.51, 0.96)                                                                               | 1.02 (0.66-1.57, 0.93)                                                                           |
| rs3856806        | <i>PPARG</i>        | 0.14 (T)                                         | 0.15 (T)                                   | 0.94 (0.66-1.35, 0.74)                                                                               | 0.94 (0.65-1.35, 0.72)                                                                           |
| rs13266634       | <i>SLC30A8</i>      | 0.22 (T)                                         | 0.22 (T)                                   | 0.83 (0.61-1.13, 0.23)                                                                               | 0.88 (0.64-1.21, 0.44)                                                                           |
| rs757210         | <i>TCF2</i>         | n/a                                              | 0.28 (A)                                   | 0.97 (0.74-1.27, 0.82)                                                                               | 0.96 (0.73-1.26, 0.76)                                                                           |
| <b>rs7578597</b> | <b><i>THADA</i></b> | 0.83 ( <sup>g</sup> T)                           | 0.87 ( <sup>g</sup> T)                     | <b>1.51 (1.04-2.22, 0.03)</b>                                                                        | <b>1.58 (1.07-2.3, 0.02)</b>                                                                     |
| rs7903146        | <i>TCF7L2</i>       | 0.29 (T)                                         | 0.29 (T)                                   | 1.10 (0.84-1.45, 0.47)                                                                               | 1.14 (0.86-1.50, 0.36)                                                                           |
| rs12255372       | <i>TCF7L2</i>       | 0.24 (T)                                         | 0.22 (T)                                   | 1.17 (0.87-1.57, 0.30)                                                                               | 1.19 (0.88-1.62, 0.25)                                                                           |
| rs7961581        | <i>TSPAN8</i>       | 0.35 (C)                                         | 0.33 (C)                                   | 0.80 (0.61-1.05, 0.11)                                                                               | 0.77 (0.58-1.01, 0.06)                                                                           |
| rs9472138        | <i>VEGFA</i>        | 0.23 (T)                                         | 0.16 (T)                                   | 0.97 (0.68-1.38, 0.87)                                                                               | 1.02 (0.71-1.46, 0.93)                                                                           |
| rs10010131       | <i>WFS1</i>         | 0.33 (A)                                         | 0.26 (A)                                   | 0.94 (0.69-1.27, 0.67)                                                                               | 0.98 (0.72-1.35, 0.94)                                                                           |

<sup>a</sup>SNP: Single nucleotide polymorphism; <sup>b</sup>GIH: Gujarati Indians in Houston, where, n/a=frequency is not available in HapMap data; <sup>c</sup>IMS: Indian Migration Study; <sup>d</sup>Within sib-pairs association estimate model adjusted for age, sex and location; <sup>e</sup>95%CI: 95% confidence interval; <sup>f</sup>model adjusted for body mass index; <sup>g</sup>T: major allele (C: minor allele); <sup>h</sup>Corrected overall critical p-value using false discovery rate = 0.002.
